# Supplementary material
Source: PubMed Central journal article supplement (PMC4159722)
Supplement: NIHMS611359-supplement-Cover_letter.pdf [file NIHMS611359-supplement-Cover_letter.pdf]

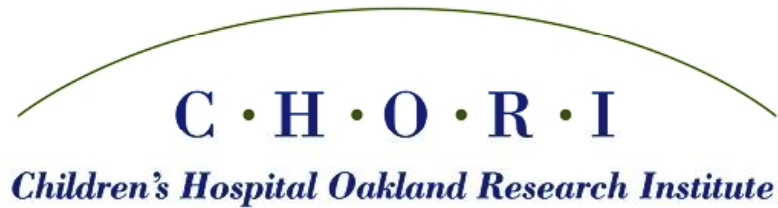

Dr. Mark Ratain  
Editor  
Pharmacogenetics and Genomics

June 29, 2014

RE: PGEN-2013-152R1, entitled "Ancestry and other genetic associations with plasma PCSK9 response to simvastatin"

Dear Dr. Ratain,

Please find attached a revision of our manuscript "Ancestry and other genetic associations with plasma PCSK9 response to simvastatin" for consideration for publication as an original article in *Pharmacogenetics and Genomics*.

We have responded to the additional comments from reviewer #2 and have made revisions in the text where applicable. We hope that our paper will now be suitable for publication in *Pharmacogenetics and Genomics*.

Thank you for your consideration of this manuscript.

Sincerely,

A handwritten signature in black ink, appearing to read "RM Krauss".

Ronald M. Krauss, MD  
Senior Scientist and Director, Atherosclerosis Research  
Adjunct Professor of Medicine, UCSF

A handwritten signature in black ink, appearing to read "Elizabeth Theusch".

Elizabeth Theusch, PhD  
Postdoctoral Fellow

A handwritten signature in black ink, appearing to read "Marisa W. Medina".

Marisa W. Medina, PhD  
Assistant Scientist

A handwritten signature in black ink, appearing to read "Jerome I. Rotter".

Jerome I. Rotter, MD  
Professor of Pediatrics, Medicine, and Human Genetics  
Director, Institute for Translational Genomics and  
Population Sciences, LA BioMed
