# Supplementary material
Source: PubMed Central journal article supplement (PMC4159722)
Supplement: NIHMS611359-supplement-TheuschEtAlFigureS1.pdf [file NIHMS611359-supplement-TheuschEtAlFigureS1.pdf]

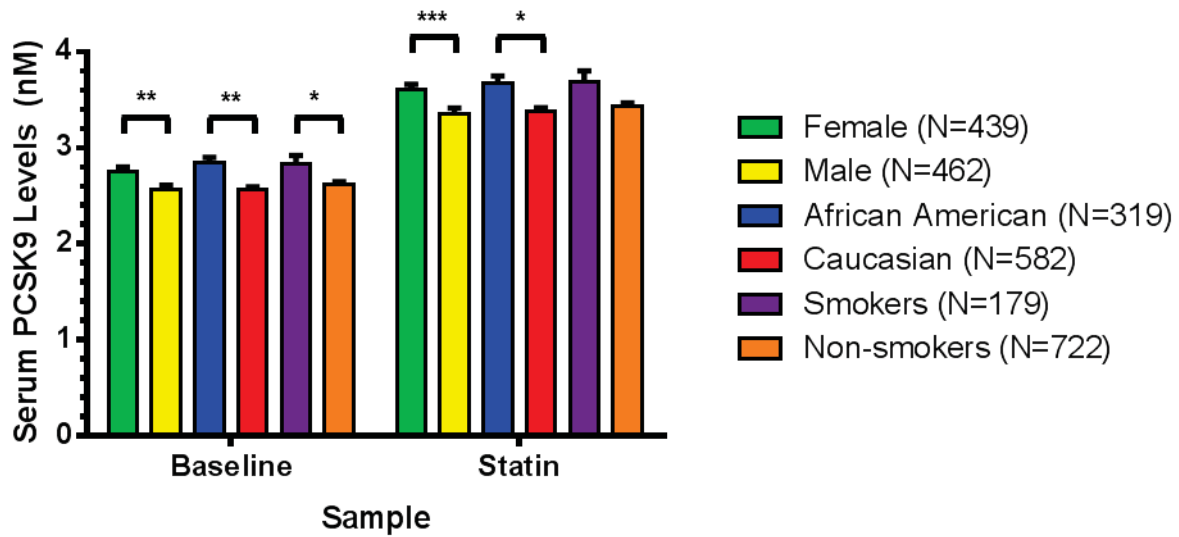

**Supplementary Figure S1.** Average PCSK9 levels in serum samples taken at baseline and after six weeks of 40 mg/day simvastatin treatment in CAP (N=901) split by gender, self-reported race, and smoking status covariates. Error bars represent standard errors. P-values were calculated using Wilcoxon rank-sum tests. \* $p < 0.05$ , \*\* $p < 0.0005$ , \*\*\* $p < 0.0001$
