# Supplementary material
Source: PubMed Central journal article supplement (PMC4159722)
Supplement: NIHMS611359-supplement-TheuschEtAlFigureS2.pdf [file NIHMS611359-supplement-TheuschEtAlFigureS2.pdf]

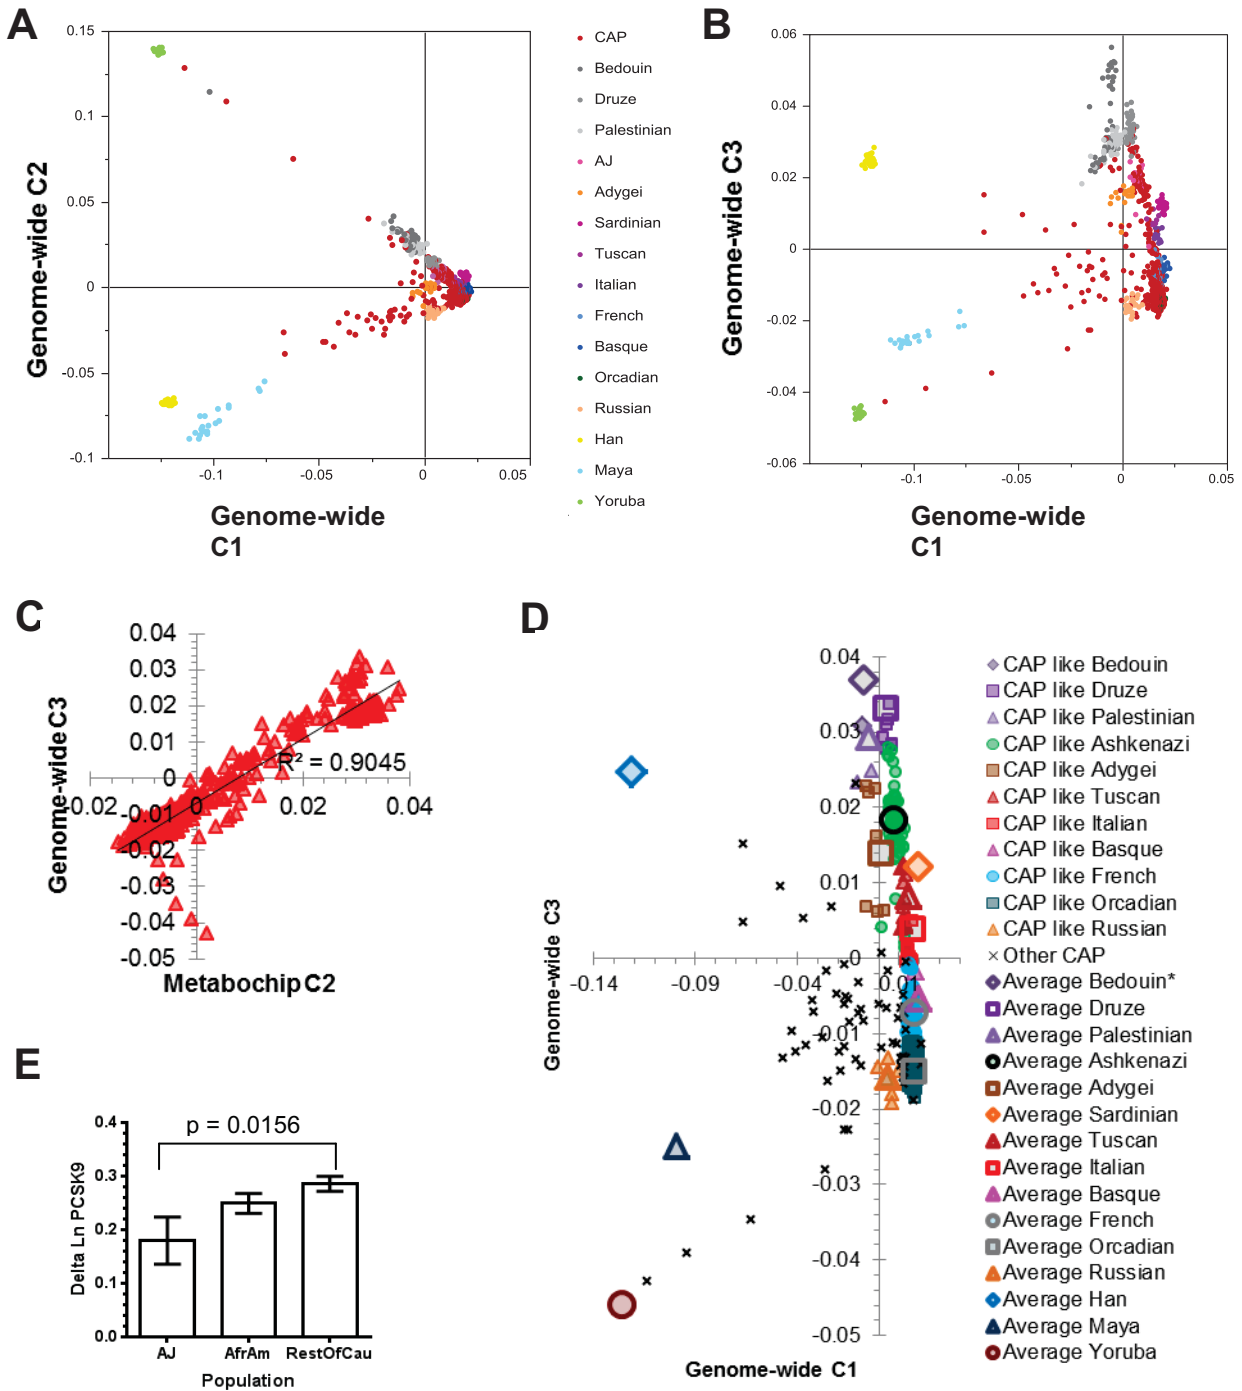

**Supplementary Figure S2.** Genetic ancestry of CAP participants and its relationship to statin-induced changes in PCSK9. Ancestry multi-dimensional scaling (MDS) plots for N=587 CAP self-reported Caucasians with selected Human Genome Diversity Panel and Ashkenazi Jewish reference populations generated using 300K+ genome-wide genotypes showing the A) second vs. first ancestry axes and B) third vs. first ancestry axes. C) Linear regression comparing genome-wide C3 to metabochip C2. D) Genome-wide C3 vs. C1 MDS plot with CAP participants classified by closest reference population. E) Comparison of statin-induced changes in plasma PCSK9 in CAP self-reported Caucasians classified as Ashkenazi Jewish versus other CAP self-reported Caucasians and CAP self-reported African Americans. Bars are mean  $\pm$  standard error, and a two-sided t-test was used to compare Ashkenazi Jews to the rest of the self-reported CAP Caucasians.
