# Supplementary material
Source: PubMed Central journal article supplement (PMC4159722)
Supplement: NIHMS611359-supplement-TheuschEtAlFigureS3.pdf [file NIHMS611359-supplement-TheuschEtAlFigureS3.pdf]

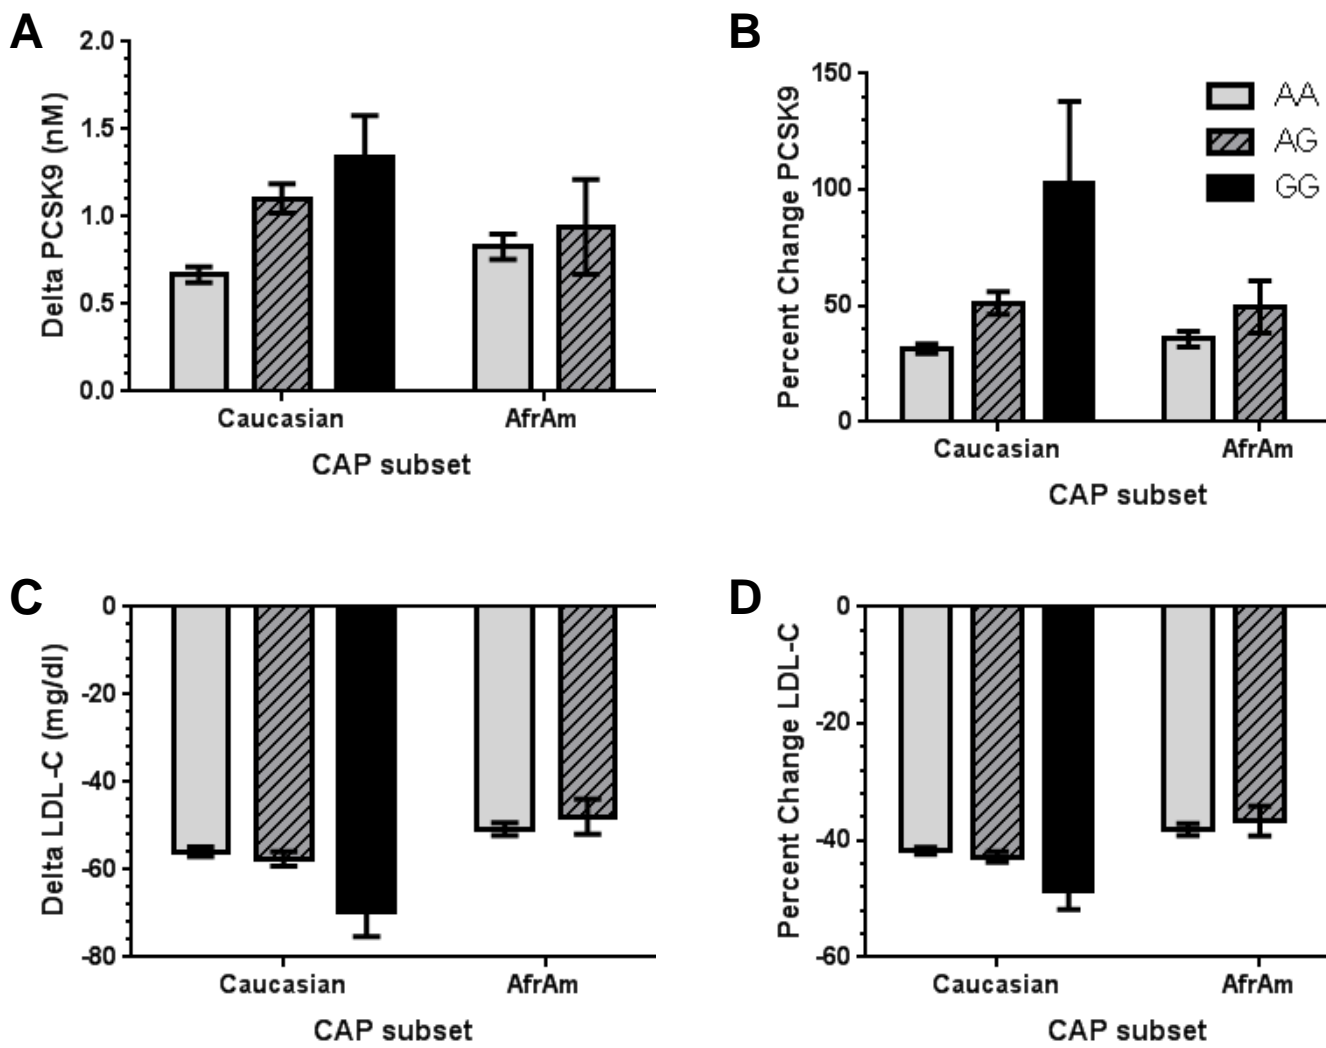

**Supplementary Figure S3.** Statin-induced changes in plasma PCSK9 and LDL-cholesterol levels in participants of the CAP simvastatin clinical trial split by rs13064411 genotype and self-reported ancestry. Values shown are absolute change (statin-baseline) in A) PCSK9 and C) LDL-cholesterol and percent change  $100 \times (\text{statin-baseline}) / \text{baseline}$  in B) PCSK9 and D) LDL-C. CAP Caucasians consisted of 398 AA, 154 AG, and 10 GG individuals while CAP African Americans consisted of 270 AA and 17 AG individuals. Bars are mean  $\pm$  standard error.
