# Supplementary material
Source: PubMed Central journal article supplement (PMC4159722)
Supplement: NIHMS611359-supplement-TheuschEtAlFigureS4.pdf [file NIHMS611359-supplement-TheuschEtAlFigureS4.pdf]

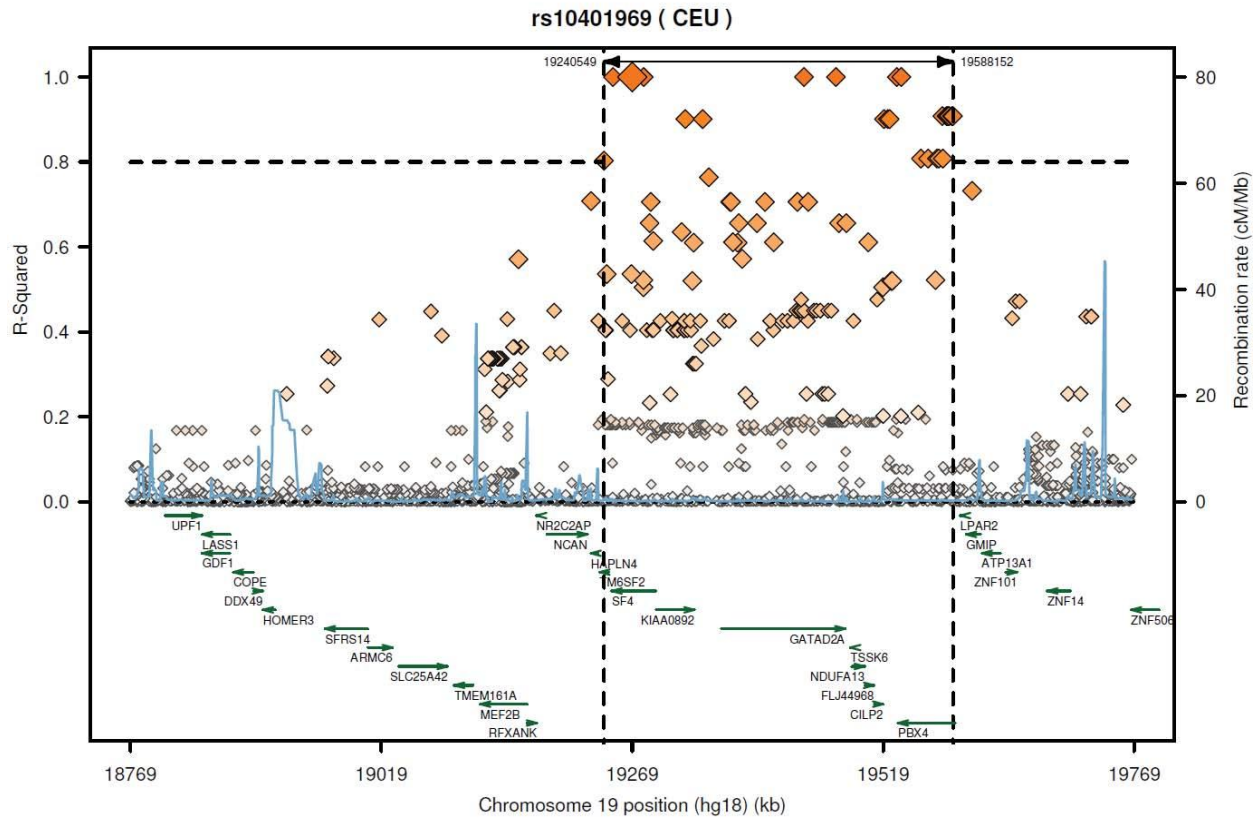

**Supplementary Figure S4.** LD of rs13064411 with other SNPs in 1kGP pilot CEU population generated with SNAP [1].

### **Supplementary Reference**

1. Johnson AD, Handsaker RE, Pulit S, Nizzari MM, O'Donnell CJ, de Bakker PIW. SNAP: A web-based tool for identification and annotation of proxy SNPs using HapMap. *Bioinformatics* 2008; 24(24): 2938-2939.
