# Supplementary material
Source: PubMed Central journal article supplement (PMC4159722)
Supplement: NIHMS611359-supplement-TheuschEtAlFigureS5.pdf [file NIHMS611359-supplement-TheuschEtAlFigureS5.pdf]

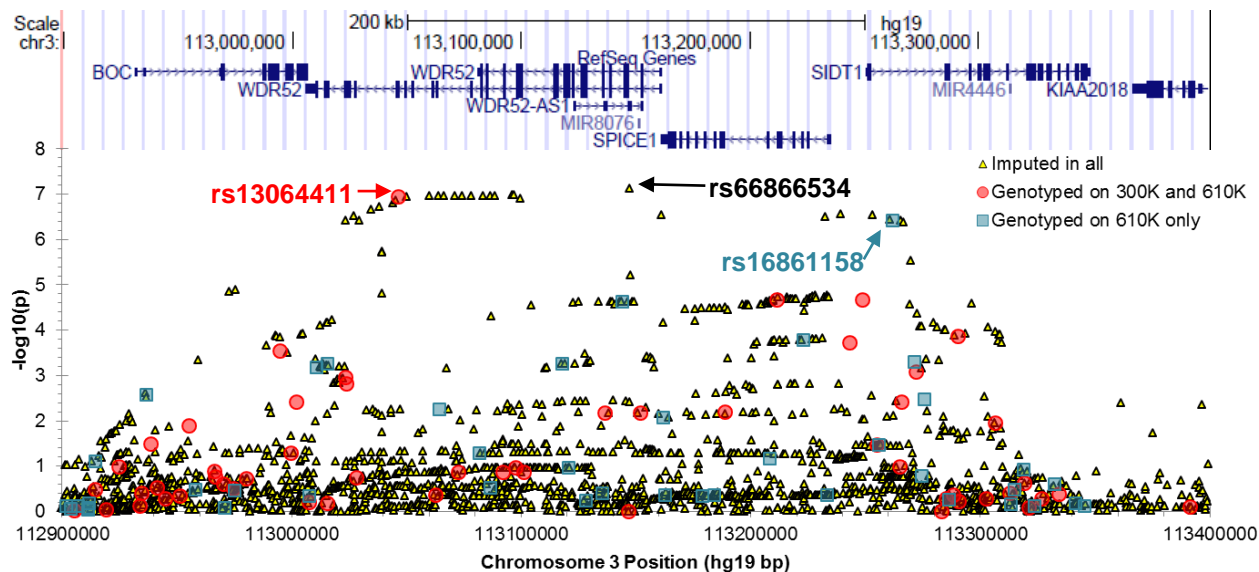

**Supplementary Figure S5.** Associations of imputed and directly genotyped genetic variants in the region surrounding rs13064411 with delta log PCSK9 adjusted for the third genome-wide ancestry axis. The most associated imputed variant, rs66866534 in intron 2 of *WDR52*, had an association  $p = 7.62 \times 10^{-8}$ .
