# Supplementary material
Source: PubMed Central journal article supplement (PMC4159722)
Supplement: NIHMS611359-supplement-TheuschEtAlTableS1.pdf [file NIHMS611359-supplement-TheuschEtAlTableS1.pdf]

**Supplementary Table S1.** Baseline levels, statin levels, and statin-induced changes of plasma biomarkers measured in 901 CAP participants with measurements of PCSK9 levels available. Values are mean  $\pm$  standard deviation.

| <b>Phenotype</b>                 | <b>Baseline</b> | <b>Statin</b>   | <b>Delta</b>      | <b>% Change</b>   | <b>Delta Log</b>   |
|----------------------------------|-----------------|-----------------|-------------------|-------------------|--------------------|
| <b>PCSK9 (nM)</b>                | 2.66 $\pm$ 0.92 | 3.48 $\pm$ 1.22 | 0.817 $\pm$ 1.059 | 37.9 $\pm$ 51.9%  | 0.266 $\pm$ 0.326  |
| <b>LDL-cholesterol (mg/dl)</b>   | 131. $\pm$ 33.5 | 77.8 $\pm$ 24.5 | -53.0 $\pm$ 25.5  | -39.7 $\pm$ 15.6% | -0.537 $\pm$ 0.253 |
| <b>APOB (mg/dl)</b>              | 94.2 $\pm$ 21.5 | 66.0 $\pm$ 17.3 | -28.3 $\pm$ 15.5  | -29.3 $\pm$ 13.5% | -0.364 $\pm$ 0.185 |
| <b>Total cholesterol (mg/dl)</b> | 209. $\pm$ 36.3 | 154. $\pm$ 28.5 | -55.1 $\pm$ 27.9  | -25.7 $\pm$ 11.2% | -0.308 $\pm$ 0.146 |
| <b>HDL-cholesterol (mg/dl)</b>   | 53.8 $\pm$ 16.6 | 56.1 $\pm$ 17.5 | 2.29 $\pm$ 7.48   | 5.15 $\pm$ 13.8%  | 0.0415 $\pm$ 0.133 |
| <b>Triglycerides (mg/dl)</b>     | 121. $\pm$ 69.5 | 100. $\pm$ 64.3 | -21.2 $\pm$ 56.7  | -11.4 $\pm$ 40.0% | -0.201 $\pm$ 0.391 |
