# Supplementary material
Source: PubMed Central journal article supplement (PMC4159722)
Supplement: NIHMS611359-supplement-TheuschEtAlTableS2.pdf [file NIHMS611359-supplement-TheuschEtAlTableS2.pdf]

**Supplementary Table S2.** SNPs near rs13064411 and their associations with delta log PCSK9 in CAP Caucasians, their linkage disequilibrium ( $r^2$ ) with rs13064411 in HapMap CEU according to SNAP [1], and whether they were genotyped on the Illumina HumanHap300 platform (300K). The region was defined by requiring the most outlying SNPs to have an  $r^2 > 0.3$  with rs13064411. All of these SNPs were genotyped on the Illumina HumanHap610-Quad platform.

| SNP               | Chr 3 bp (hg18)  | Allele   | N          | Beta          | P               | R <sup>2</sup> with rs13064411 | 300K     |
|-------------------|------------------|----------|------------|---------------|-----------------|--------------------------------|----------|
| rs775227          | 114477764        | C        | 562        | 0.08891       | 0.0002          | <b>0.427</b>                   | Y        |
| rs775229          | 114482301        | G        | 562        | 0.03642       | 0.05151         | 0.069                          | Y        |
| rs808951          | 114484840        | T        | 562        | 0.06472       | 0.00394         | <b>0.309</b>                   | Y        |
| rs11919134        | 114490215        | A        | 562        | -0.0108       | 0.6473          | 0.029                          | Y        |
| rs17255413        | 114490267        | A        | 273        | 0.06661       | 0.4042          | 0                              | Y        |
| rs775214          | 114493640        | C        | 273        | 0.06331       | 0.03692         | <b>0.386</b>                   |          |
| rs808950          | 114498243        | A        | 273        | 0.06646       | 0.02984         | <b>0.473</b>                   |          |
| rs2270781         | 114498350        | A        | 562        | -0.0114       | 0.6459          | 0.042                          | Y        |
| rs2270783         | 114506365        | T        | 562        | 0.0741        | 0.0009          | <b>0.559</b>                   | Y        |
| rs2270785         | 114506708        | C        | 561        | 0.07077       | 0.00147         | <b>0.559</b>                   | Y        |
| rs1353903         | 114511024        | A        | 562        | -0.0285       | 0.185           | 0.074                          | Y        |
| <b>rs13064411</b> | <b>114529330</b> | <b>G</b> | <b>562</b> | <b>0.1421</b> | <b>8.24E-08</b> | <b>1</b>                       | <b>Y</b> |
| rs4682133         | 114545676        | A        | 561        | -0.0178       | 0.4428          | 0.056                          | Y        |
| rs6438140         | 114547084        | C        | 272        | 0.0186        | 0.4846          | 0.268                          |          |
| rs7648620         | 114555446        | G        | 562        | -0.0648       | 0.1349          | 0.011                          | Y        |
| rs2306792         | 114564525        | C        | 272        | -0.1072       | 0.2959          | 0.002                          |          |
| rs13326562        | 114569461        | T        | 273        | -0.0334       | 0.613           | 0.009                          |          |
| rs1463640         | 114574887        | C        | 561        | -0.0317       | 0.139           | 0.074                          | Y        |
| rs11919031        | 114580344        | A        | 561        | -0.0646       | 0.1419          | 0.011                          | Y        |
| rs1392284         | 114584100        | A        | 562        | -0.032        | 0.1359          | 0.074                          | Y        |
| rs7643843         | 114600587        | A        | 273        | 0.01622       | 0.562           | <b>0.366</b>                   |          |
| rs3732807         | 114603406        | C        | 273        | 0.01324       | 0.8431          | 0.011                          |          |
| rs13059888        | 114610741        | T        | 269        | 0.00951       | 0.8179          | 0.013                          |          |
| rs12635786        | 114618035        | C        | 272        | -0.0348       | 0.2684          | 0.059                          |          |
| rs7623122         | 114619108        | T        | 562        | 0.05352       | 0.00673         | 0.277                          | Y        |
| rs1386336         | 114626843        | T        | 272        | 0.0688        | 0.04728         | <b>0.767</b>                   |          |
| rs10934229        | 114629387        | C        | 562        | -0.0002       | 0.9944          | 0.042                          | Y        |
| rs6768117         | 114634531        | G        | 562        | 0.05352       | 0.00673         | 0.277                          | Y        |
| rs6775574         | 114644785        | G        | 273        | 0.01972       | 0.4597          | 0.259                          |          |
| rs11926687        | 114645260        | G        | 273        | 0.05155       | 0.5305          | 0.009                          |          |
| rs16861014        | 114661764        | G        | 273        | 0.05155       | 0.5305          | 0.009                          |          |
| rs16861023        | 114666876        | A        | 273        | 0.05155       | 0.5305          | 0.009                          |          |
| rs12488964        | 114671495        | T        | 561        | 0.05506       | 0.00481         | 0.259                          | Y        |
| rs3928555         | 114690914        | T        | 273        | -0.0016       | 0.9585          | 0.08                           |          |
| rs1486894         | 114694203        | A        | 561        | 0.1021        | 1.00E-05        | <b>0.731</b>                   | Y        |
| rs2399477         | 114705688        | G        | 273        | 0.06578       | 0.03673         | <b>0.583</b>                   |          |

| SNP        | Chr 3 bp (hg18) | Allele | N   | Beta      | P        | R <sup>2</sup> with<br>rs13064411 | 300K |
|------------|-----------------|--------|-----|-----------|----------|-----------------------------------|------|
| rs16861103 | 114715878       | A      | 272 | 0.06438   | 0.04128  | 0.011                             |      |
| rs7649405  | 114725980       | C      | 560 | 0.1279    | 0.00029  | <b>0.573</b>                      | Y    |
| rs6799610  | 114731438       | T      | 562 | 0.099     | 1.90E-05 | <b>0.731</b>                      | Y    |
| rs4621301  | 114737862       | T      | 562 | -0.0682   | 0.03529  | 0.006                             | Y    |
| rs6780755  | 114738489       | C      | 273 | -0.0329   | 0.4869   | 0.008                             |      |
| rs16861158 | 114744399       | T      | 269 | 0.1007    | 0.00957  | <b>0.888</b>                      |      |
| rs2254267  | 114747684       | C      | 562 | -0.048    | 0.1008   | 0.008                             | Y    |
| rs2669909  | 114748417       | A      | 561 | 0.06601   | 0.00278  | <b>0.559</b>                      | Y    |
| rs2399488  | 114754096       | A      | 273 | 0.03034   | 0.3012   | 0.21                              |      |
| rs1513287  | 114754898       | C      | 562 | 0.06679   | 0.00079  | 0.179                             | Y    |
| rs17258900 | 114757305       | G      | 273 | -0.0794   | 0.1869   | 0.011                             |      |
| rs7611694  | 114758314       | C      | 272 | 0.0352    | 0.2101   | 0.169                             |      |
| rs3896909  | 114765968       | G      | 562 | -2.00E-05 | 0.9993   | 0.03                              | Y    |
| rs2271496  | 114767966       | T      | 562 | -0.034    | 0.5242   | 0                                 | Y    |
| rs2292511  | 114769095       | A      | 273 | -0.0264   | 0.4238   | 0.04                              |      |
| rs11929640 | 114771120       | A      | 562 | -0.017    | 0.444    | 0.033                             | Y    |
| rs13092825 | 114773158       | C      | 561 | 0.09474   | 0.00013  | <b>0.373</b>                      | Y    |

### Supplementary Reference

1. Johnson AD, Handsaker RE, Pulit S, Nizzari MM, O'Donnell CJ, de Bakker PIW. SNAP: A web-based tool for identification and annotation of proxy SNPs using HapMap. *Bioinformatics* 2008; 24(24): 2938-2939.
